# Supplementary material for: Biodistribution of gadolinium- and near infrared-labeled human umbilical cord mesenchymal stromal cell-derived exosomes in tumor bearing mice
Source: PubMed Central journal article supplement — Theranostics. 2019 Apr 12;9(8):2325–45. doi: 10.7150/thno.30030 (PMC6531310; doi:10.7150/thno.30030), 2019-04-12
Supplement: thnov09p2325s1.pdf [file thnov09p2325s1.pdf]

1 **Biodistribution of gadolinium- and near infrared-**  
2 **labeled human umbilical cord mesenchymal stromal**  
3 **cell-derived exosomes in tumor bearing mice**

4

5 **SUPPLEMENTARY INFORMATION**

6 Javier Abello<sup>1,2</sup>, Tuyen Duong Thanh Nguyen<sup>3,4</sup>, Ramesh Marasini<sup>3,4</sup>, Santosh Aryal<sup>3,4\*</sup> and  
7 Mark Louis Weiss<sup>1,5\*</sup>

8 **Authors information:**

9 <sup>1</sup>Department of Anatomy and Physiology, Kansas State University, Manhattan, KS 66506, USA

10 <sup>2</sup>Department of Food, Nutrition, Dietetics and Health, Kansas State University, Manhattan, KS  
11 66506, USA

12 <sup>3</sup>Department of Chemistry, Kansas State University, Manhattan, KS 66506, USA

13 <sup>4</sup>Nanotechnology Innovation Center of Kansas State (NICKS), Kansas State University,  
14 Manhattan, KS 66506, USA

15 <sup>5</sup> Midwest Institute of Comparative Stem Cell Biology, Kansas State University,  
16 Manhattan, KS 66506, USA

17 **\* Corresponding Authors:**

18  
19 M.L. Weiss, Ph. D. Email: [weiss@vet.k-state.edu](mailto:weiss@vet.k-state.edu)

20  
21 S. Aryal, Ph. D. Email: [saryal@ksu.edu](mailto:saryal@ksu.edu)

22  
23

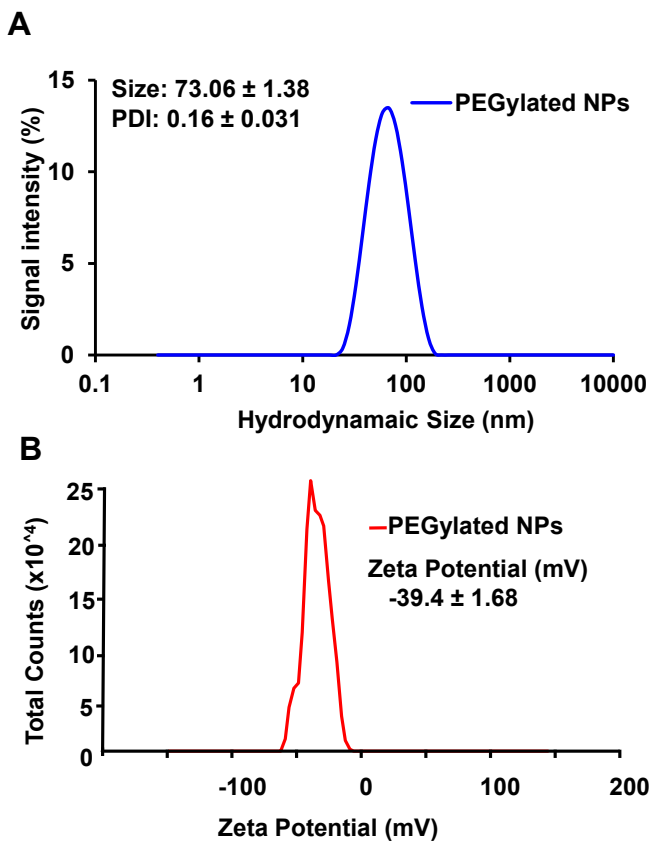

24  
25

26 **Figure S1:** A) Hydrodynamic size of PEGylated NPs made up of poly (lactic-co-glycolic  
27 acid) and 1,2-distearoyl-sn-glycero-3-phosphoethanolamine-N-[succinyl(polyethylene  
28 glycol)-2000] (ammonium salt) (DSPE-PEG) measured by DLS. B) Zeta potential of  
29 PEGylated NPs.

30  
31  
32

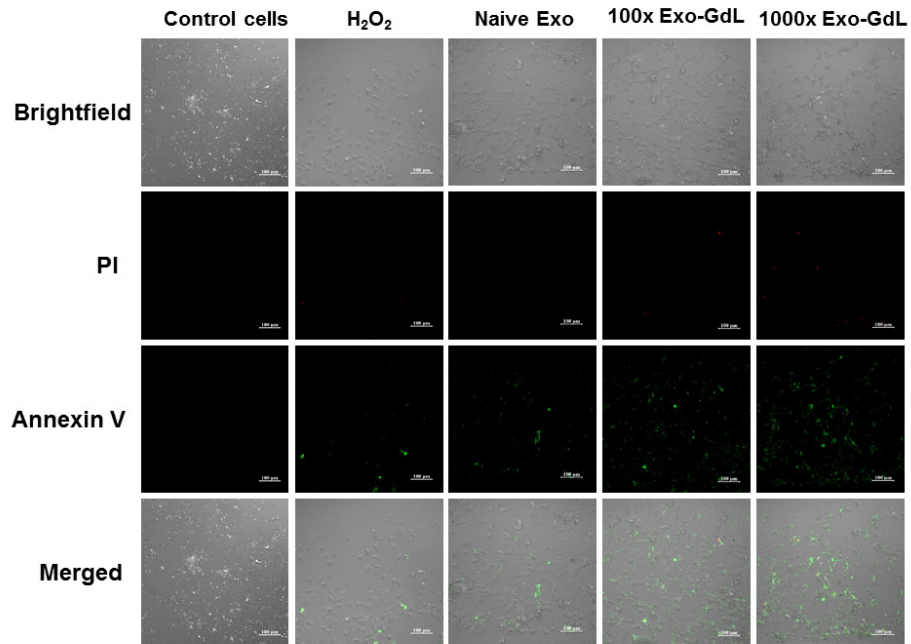

33  
34 **Figure S2: Exosomes do not increase apoptosis of osteosarcoma cells.** Murine  
35 K7M2 osteosarcoma cells were exposed to 30 ng/cm<sup>2</sup> (1X) of unlabeled human  
36 mesenchymal stromal cell derived exosomes (Naïve Exo) or 3000 ng/ cm<sup>2</sup> (100X) or  
37 30,000 ng/cm<sup>2</sup> (1000X) gadolinium-labeled exosomes (Exo-GdL) suspended in  
38 Dulbecco's modified eagle medium (DMEM) supplemented with 10% pooled human  
39 platelet lysate depleted of exosomes (dpHPL). K7M2 cells were incubated for 24 h and  
40 observed under confocal microscopy (the calibration bar is 20 μm). DMEM with 10%  
41 dpHPL media was used as negative control and DMEM with 10% dpHPL with 500 μM of  
42 H<sub>2</sub>O<sub>2</sub> was the positive control. K7M2 cells were stained with Annexin-V FITC (green)  
43 and propidium iodide (PI, red). Double-negative (no staining) were healthy cells,  
44 Annexin V-positive stained cells were in early apoptosis (green), cells Annexin V-  
45 positive and PI-positive were dead or necrotic cells (green/red).  
46
